# Supplementary material for: Bio-inspired helical EGaIn/TPU conductive fibers fabricated by a twisted coating method for flexible electronics
Source: Royal Society of Chemistry journal article supplement (doi:10.1039/d4tc04763j), 2024-12-19
Supplement: d4tc04763j1.pdf [file d4tc04763j1.pdf]

## Electronic Supplementary Information (ESI) for Bio-inspired Helical EGaIn/TPU Conductive Fiber by Twisted Coating Method for Flexible Electronics

Junwei Tang,<sup>ab</sup> Shangbi Chen,<sup>abc</sup> Ziqi Wen,<sup>ab</sup> Zifeng Zhang,<sup>ab</sup> Bin Sheng<sup>\*ab</sup>, Jing Wang<sup>\*d</sup>

- School of Optical Electrical and Computer Engineering, University of Shanghai for Science and Technology, Shanghai 200093, China.
- Shanghai Key Laboratory of Modern Optical Systems, Engineering Research Center of Optical Instruments and Systems, Shanghai 200093, China.
- Shanghai Aerospace Control Technology Institute, Shanghai 201109, China.
- Department of Ultrasound Medicine, The First Affiliated Hospital, Zhejiang University School of Medicine, Hangzhou 310003, China.

\*Corresponding Author.

E-mail address: bsheng@usst.edu.cn, (B. Sheng) yanshu006@zju.edu.cn. (J. Wang)

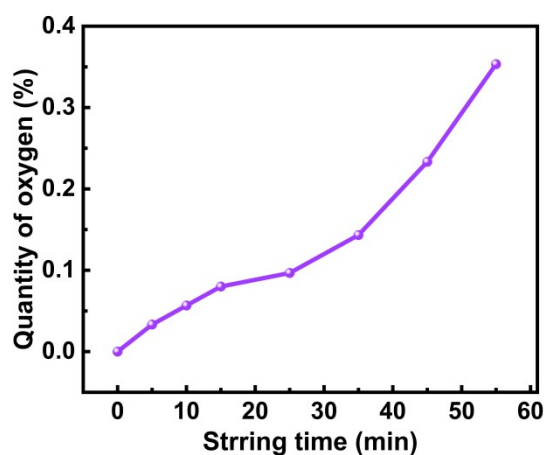

Figure S1. Changes of oxygen content with EGaIn stirring time.

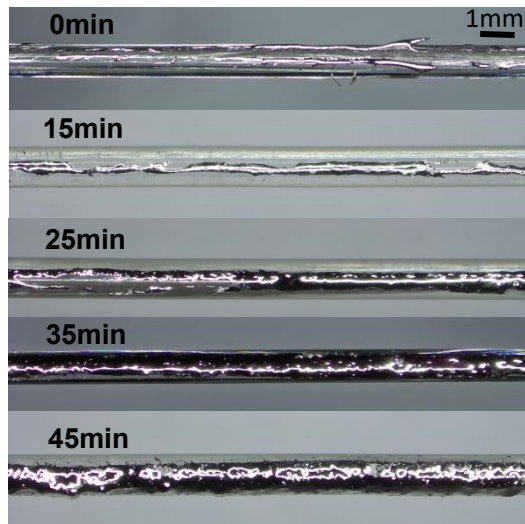

Figure S2. Optical microscope image of EGaIn stirred at different times coated on twisted TPU fibers.

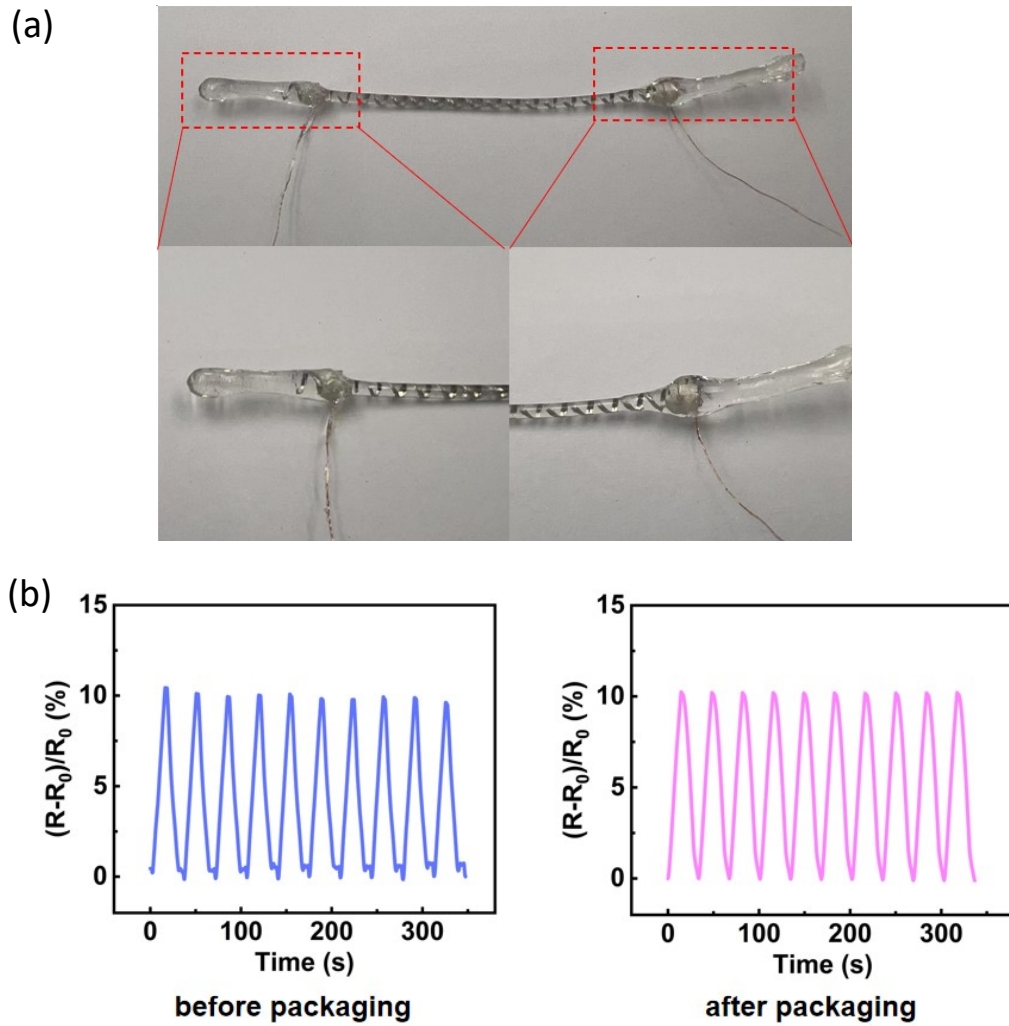

Figure S3. Electrode package diagram and reliability test. (a) Photo of electrode package (b) 20 stretch cycles at 30% before and after packaging.

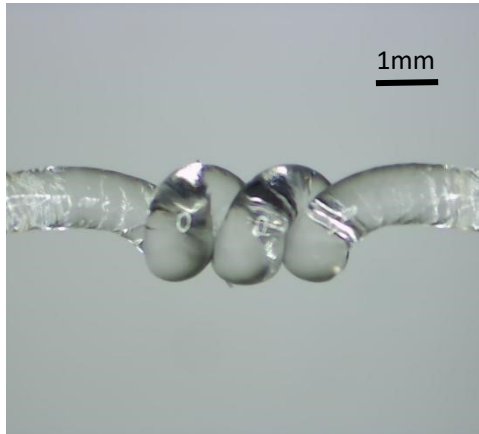

Figure S4. Optical microscope image of nodules produced by fiber torsion overload. (over 4 r/cm)

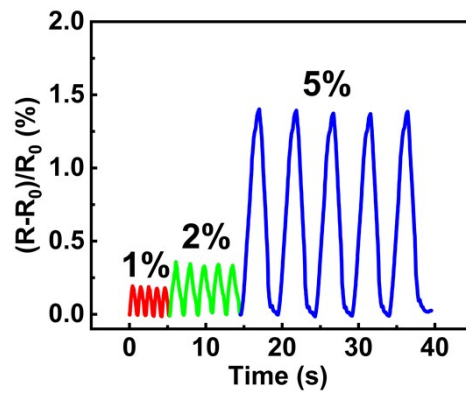

Figure S5. Changes in relative resistance under different cyclic small strains.

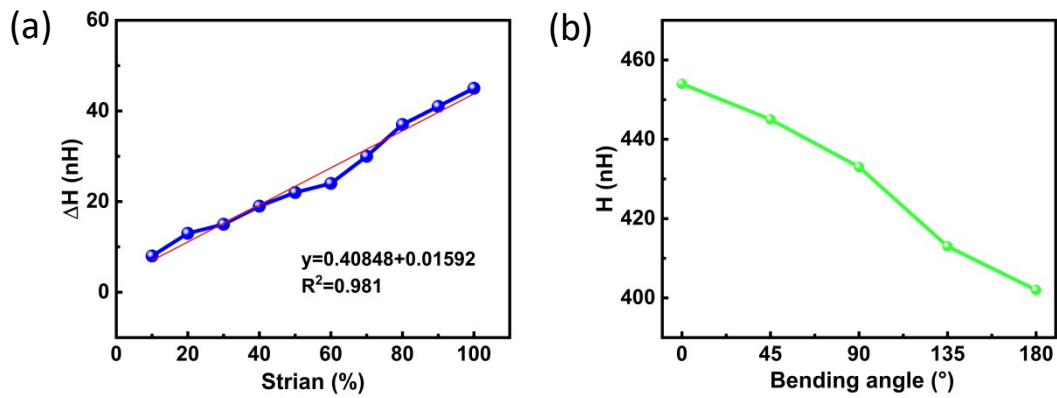

Figure S6. Application of HETF as an inductive sensor (a) Variation of inductance with elongation (b) Variation of inductance with bending angle.

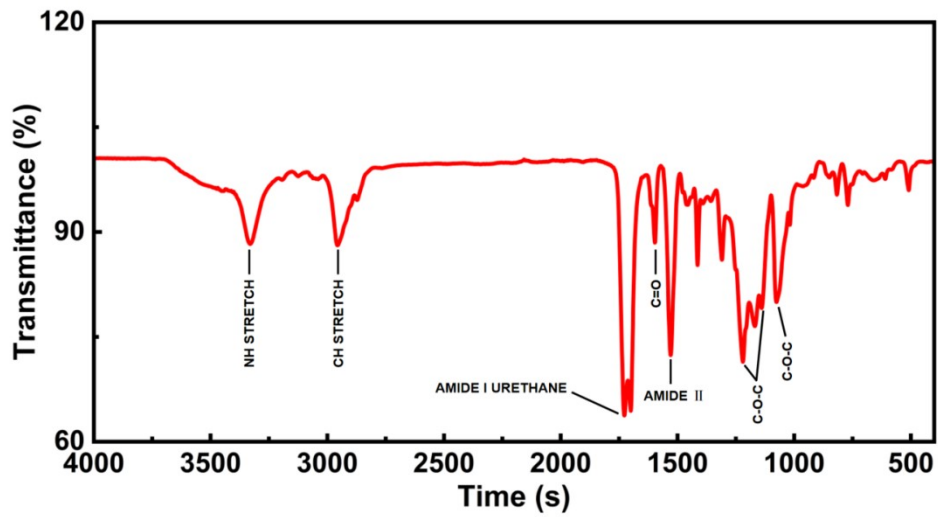

Figure S7. ATR-FTIR transmission curve of TPU fibers.

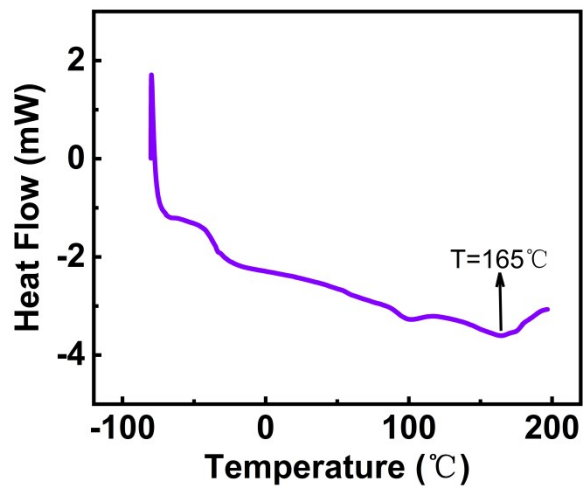

Figure S8. DSC curve of the TPU wire. The melting point of the TPU wire used in this work is 165° C.

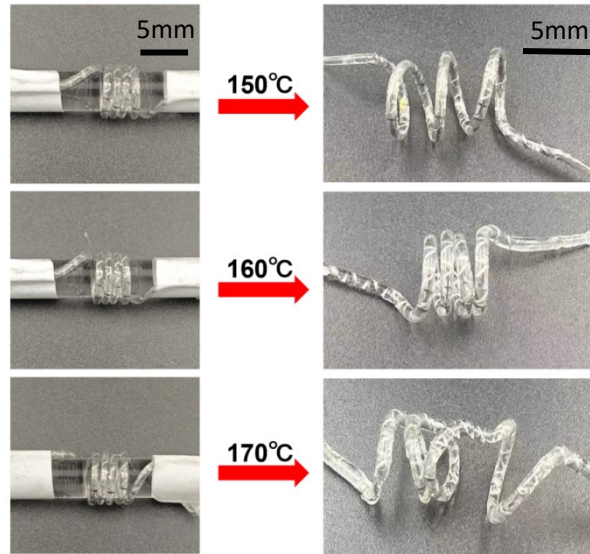

Figure S9. Before and after pictures of HETF thermoformed at different temperatures.

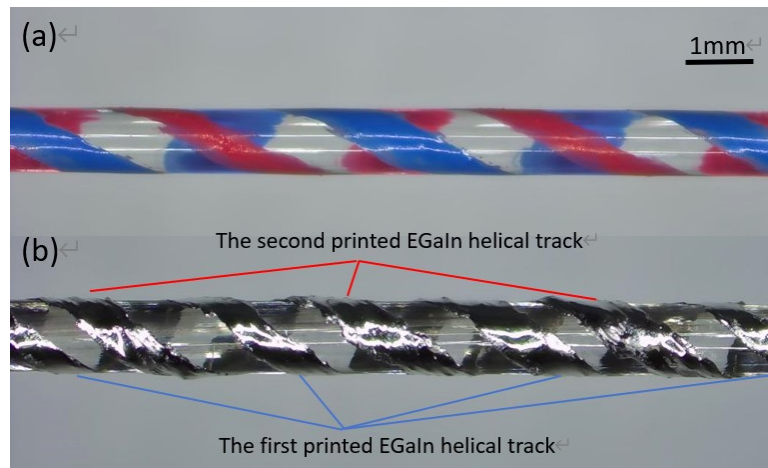

Figure S10. Image of double HETF (a) Schematic diagram of double HETF (For ease of differentiation, we use blue marker to represent the first applied EGaIn and red marker to represent the second applied EGaIn) (b) Optical microscope image of double HETF.

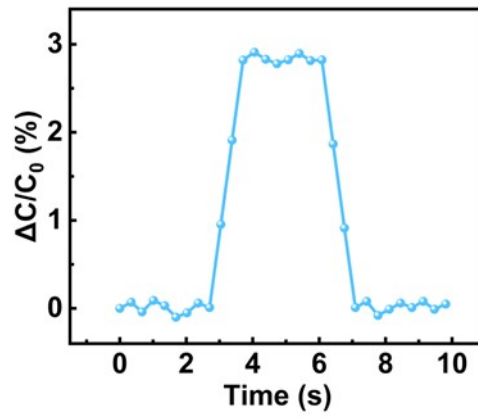

Figure S11. The response and restoration intervals of DHETF subjected to 10% strain.

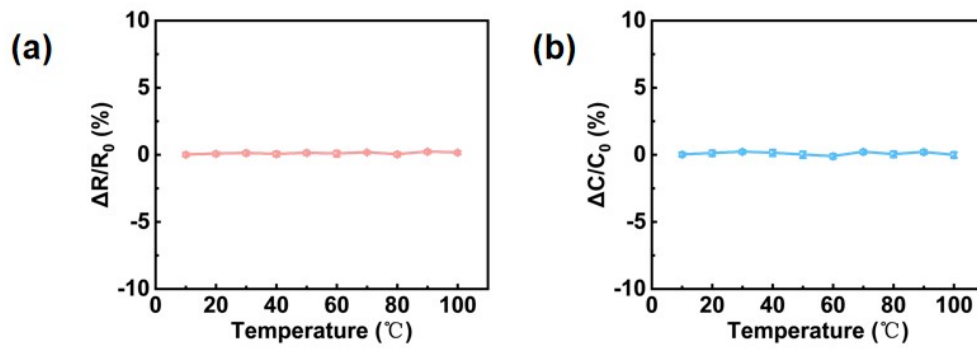

Figure S12. Relative changes of (a) HETF and (b) DHETF fiber under a wide temperature.

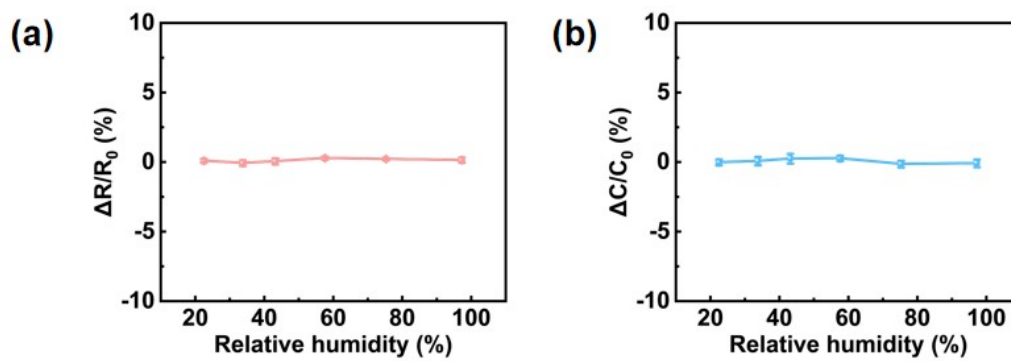

Figure S13. Relative changes of (a) HETF and (b) DHETF fiber under a high humidity range.

**Table. S1 Comparison of similar helical fibers**

| <b>References</b> | <b>Preparation methods</b>             | <b>Helical types</b>    | <b>Wearability</b> |
|-------------------|----------------------------------------|-------------------------|--------------------|
| [44]              | mechanical winding                     | three-dimensional helix | no                 |
| [46]              | wet spinning torsion                   | three-dimensional helix | no                 |
| [41]              | twisted and electron beam evaporation  | helical pattern         | no                 |
| [49]              | twisted and electrochemical deposition | helical pattern         | no                 |
| This work         | twisted coating                        | helical pattern         | yes                |

**Table. S2 Comparison of similar helical LM-based fibers**

| <b>References</b> | <b>Preparation methods</b> | <b>Demonstrations</b>                | <b>Wearability</b> |
|-------------------|----------------------------|--------------------------------------|--------------------|
| [6]               | thermoforming              | stretchable electrode, recyclability | no                 |
| [7]               | thermoforming              | stretchable electrode                | no                 |
| [43]              | double torsion             | strain sensor                        | no                 |
| [47]              | double torsion             | strain sensor                        | no                 |
| This work         | twisted coating            | strain sensor, non-contact sensor    | yes                |
